# Supplementary material for: Synthesis and characterization of a rhodamine derivative as a selective switch-on fluorescent sensor for Cu2+ ions in aqueous PBS buffer and living cells
Source: Royal Society of Chemistry journal article supplement (doi:10.1039/d3sd00291h), 2024-01-01
Supplement: d3sd00291h1.pdf [file d3sd00291h1.pdf]

### **Supporting Information**

**Synthesis and characterization of rhodamine derivative as a selective switch-on fluorescent sensor for Cu<sup>2+</sup> in aqueous PBS buffer and living cells**

Maheshkumar Prajapati<sup>a</sup>, Nidhi Pandey<sup>b</sup>, Sarita Kalla<sup>c</sup>, Sateesh Bandaru<sup>\*d</sup> and Areti Sivaiah<sup>a\*</sup>

---

**Corresponding author:** Dr. Areti Sivaiah\* - Department of Chemistry, Sardar Vallabhai National Institute of Technology Surat, Surat-Dumas road, Surat-395007, Gujarat, India; Orcid.org/0000-0002-0388-3588; E-mail: [aretis@chem.svnit.ac.in](mailto:aretis@chem.svnit.ac.in)

| <b>Sr.No.</b> | <b>Table of content</b>                                                                                                    | <b>Page No.</b> |
|---------------|----------------------------------------------------------------------------------------------------------------------------|-----------------|
| S1            | Synthesis and characterization of <b>P<sub>2</sub></b>                                                                     | 3               |
| S2            | Synthesis and characterization of <b>L<sub>1</sub></b>                                                                     | 5               |
| S3            | Synthesis and characterization of { <b>L<sub>1</sub>+Cu<sup>2+</sup></b> } Complex                                         | 7               |
| S4            | Absorption titration <b>L<sub>1</sub></b> with of various metals ions                                                      | 8               |
| S5            | Association constant obtained from the absorption titration of { <b>L<sub>1</sub>+Cu<sup>2+</sup></b> } complex            | 9               |
| S6            | Job's plot obtained from the absorption titration                                                                          | 9               |
| S7            | Determination of Limit of Detection (LOD) of <b>Cu<sup>2+</sup></b> by <b>L<sub>1</sub></b>                                | 9               |
| S8            | Comparison of the detection limits of recently developed fluorescent probes for <b>Cu<sup>2+</sup></b> in the literature.  | 10              |
| S9            | Competitive metal ion titration of <b>L<sub>1</sub></b> with <b>Cu<sup>2+</sup></b> in presence of other metal ions.       | 11              |
| S10           | Effect of pH on the fluorescence emission of <b>L<sub>1</sub></b> with <b>Cu<sup>2+</sup></b> .                            | 11              |
| S11           | MTT assay of probe <b>L<sub>1</sub></b>                                                                                    | 12              |
| S12           | Confocal fluorescence microscopy images study of <b>L<sub>1</sub></b> in presence of <b>Cu<sup>2+</sup></b> in HeLa cells. | 12              |

## S1. Synthesis and characterization of P<sub>2</sub>

P<sub>1</sub> (1.0 g, 1.0 mmol) was accurately weighed and placed in glass round-bottom flask, and 60.0 mL of ethanol was added to fully dissolve it. After cooling at room temperature and adding 4.0 mL (70.0 mmol) of hydrazine hydrate solution (85.0%), the mixture was magnetically stirred and refluxed until the colour of P<sub>1</sub> disappeared. The reaction solution was gradually cooled to room temperature, filtered under reduced pressure, and washed three times with ethyl alcohol to obtain the white solid product (P<sub>2</sub>) in 65% yield (0.511 g). **FTIR (ATR, cm<sup>-1</sup>):** 3430, 3343, 2948, 2866, 1687, 1613, 1510, 1200, 1150, 1003, 820, 739. **<sup>1</sup>H NMR (600 MHz, CDCl<sub>3</sub>) δ(ppm):** 7.95(d, J = 4.88 Hz, 1H), 7.44(m, 2H), 7.05(d, J = 4.57 Hz, 1H), 6.38(s, 2H), 6.25(s, 2H), 3.57(s, 2H), 3.52(s, 2H), 3.21(dd, J = 7.14; 6.31 Hz, 4H), 1.90(s, 6H), 1.31(t, J = 7.08 Hz, 6H); **<sup>13</sup>C NMR (150 MHz, CDCl<sub>3</sub>) δ(ppm):** 166.21, 152.25, 151.76, 147.54, 132.58, 129.87, 128.13, 127.69, 123.81, 123.03, 117.99, 104.94, 96.85, 66.05, 38.36, 16.70, 14.75.

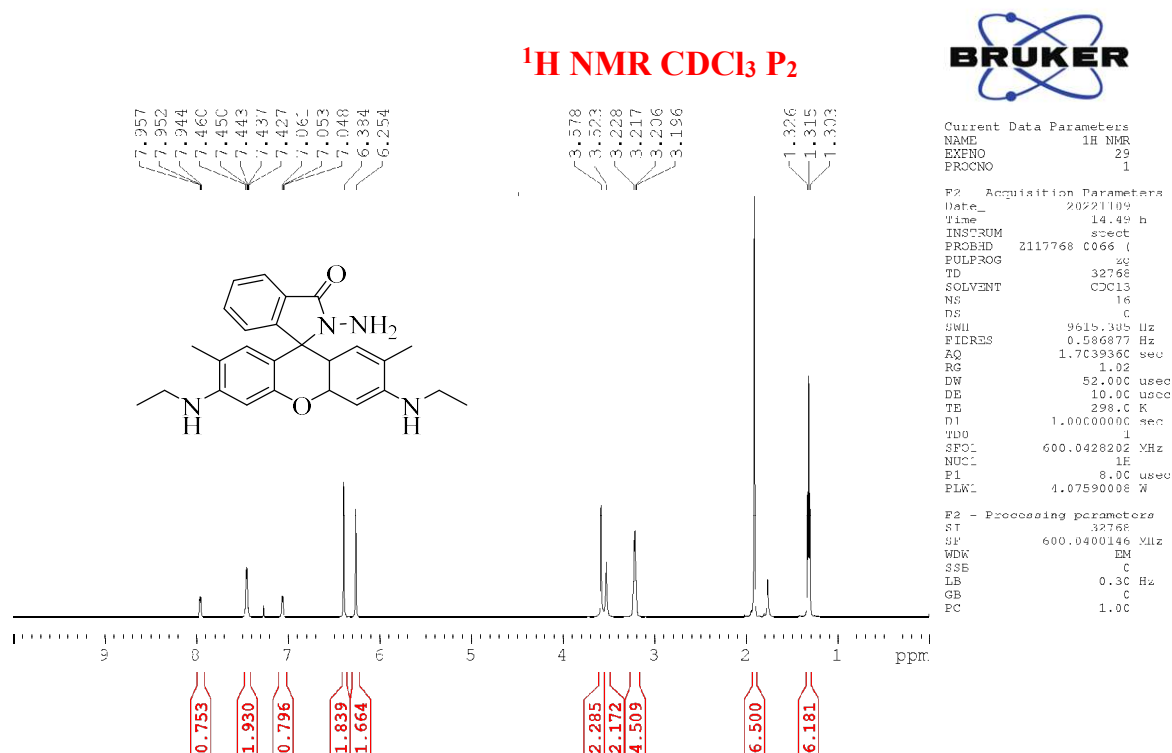

Fig.S1. <sup>1</sup>H NMR spectrum of P<sub>2</sub> in CDCl<sub>3</sub>

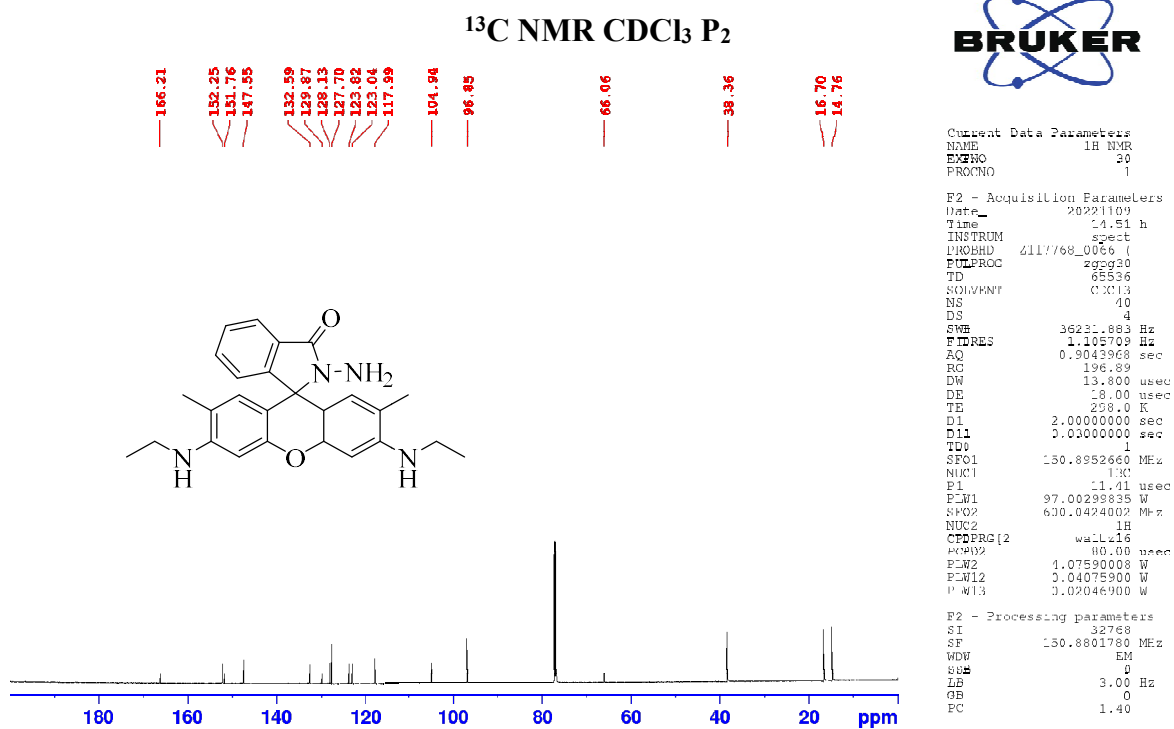

**Fig.S1.** <sup>13</sup>C NMR spectrum of P<sub>2</sub> in CDCl<sub>3</sub>

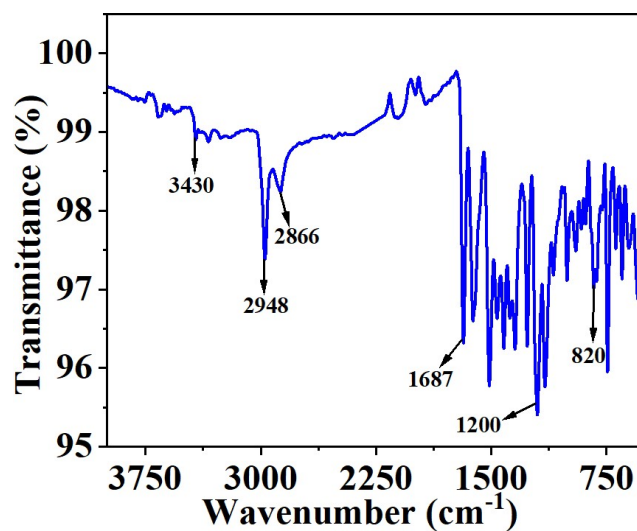

**Fig.S1.** FT-IR spectra of P<sub>2</sub>

## S2. Characterization of L<sub>1</sub>

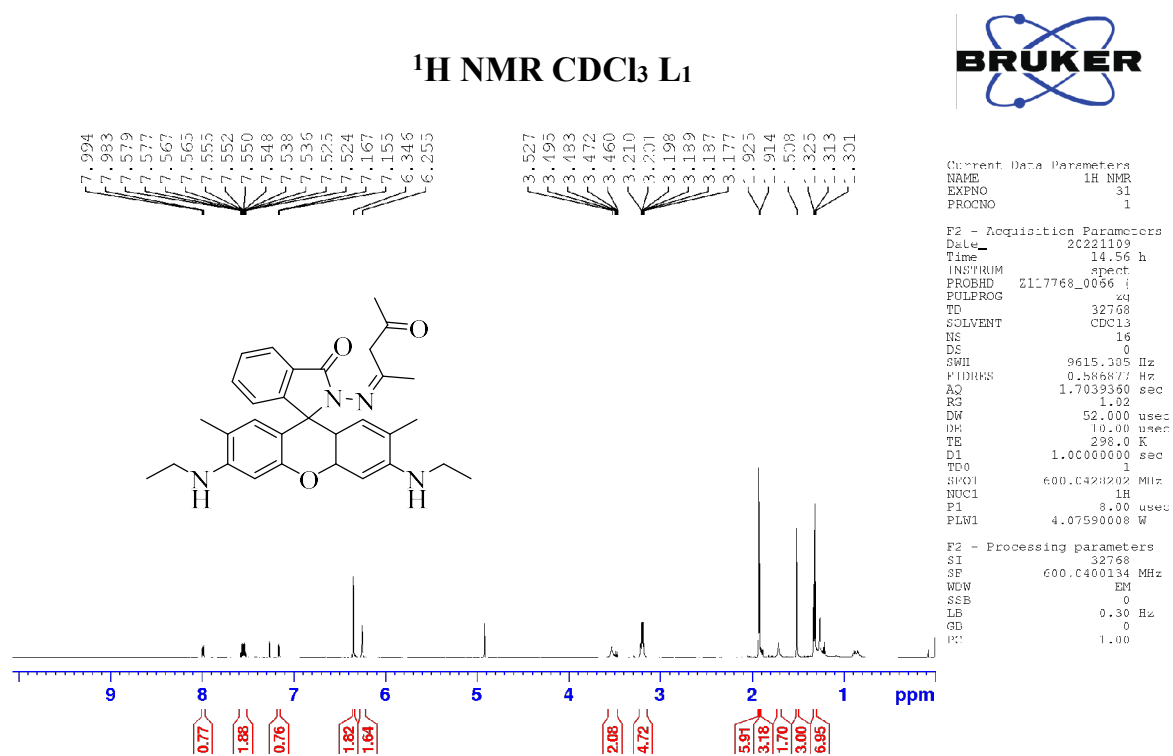

Fig.S2. <sup>1</sup>H NMR spectrum of Ligand (L<sub>1</sub>) in CDCl<sub>3</sub>

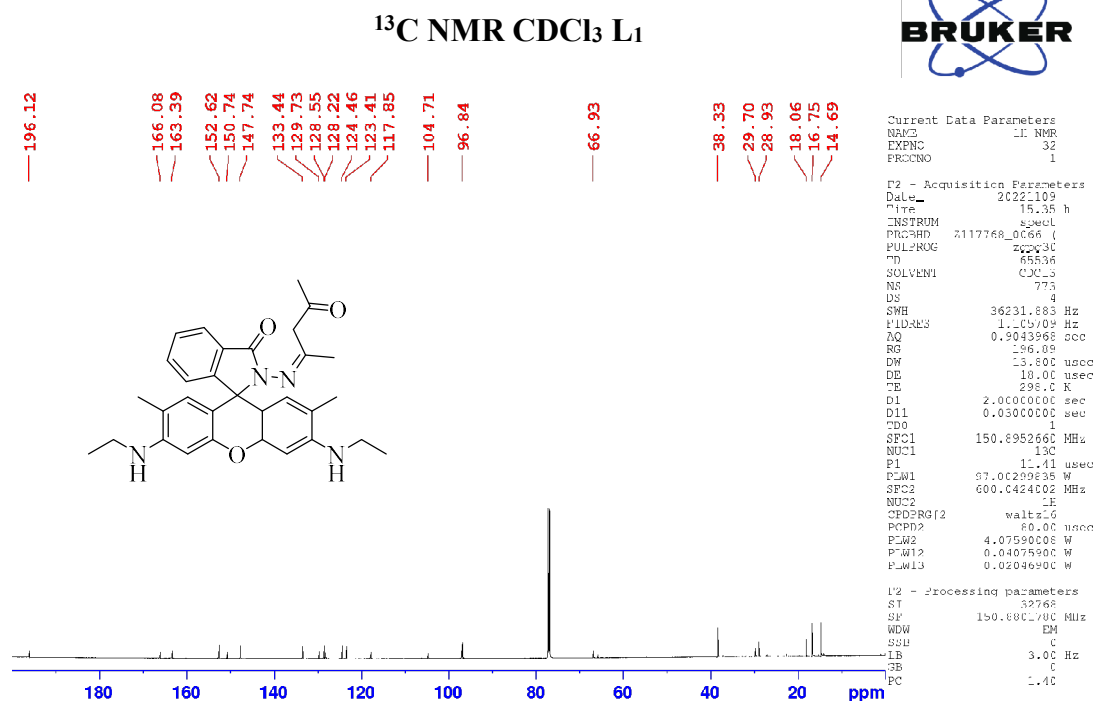

Fig.S2. <sup>13</sup>C-NMR spectrum of Ligand (L<sub>1</sub>) in CDCl<sub>3</sub>

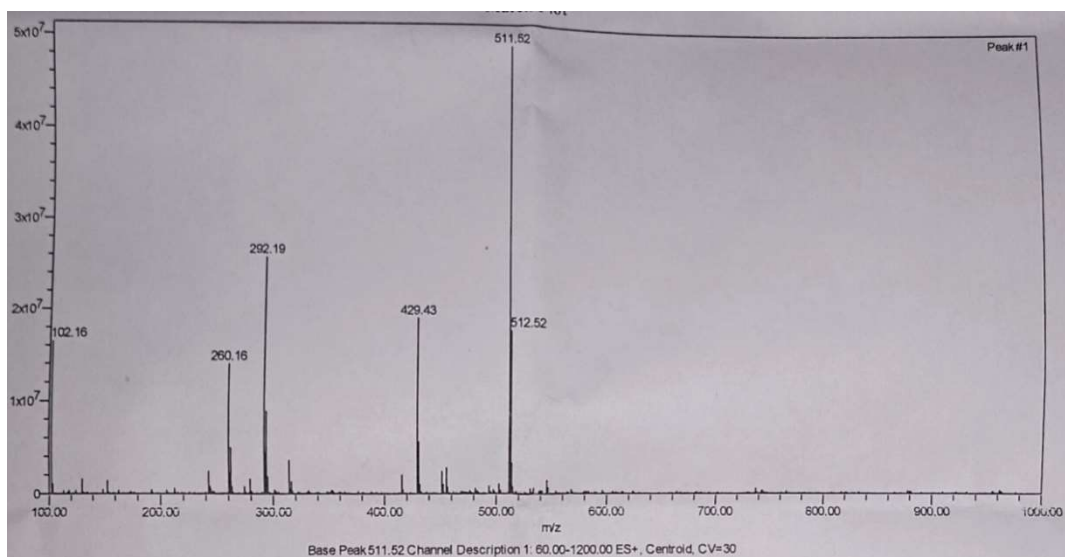

**Fig. S2.** Mass Spectra of Ligand L<sub>1</sub>: Calculated: 510.64; Observed: 511.52 [M+H]<sup>+</sup>.

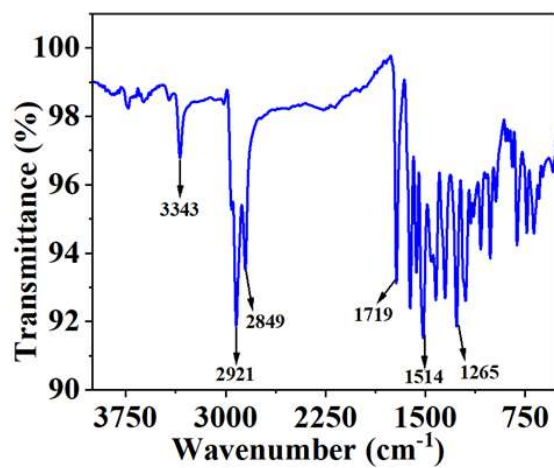

**Fig.S2.** FT-IR spectra of L<sub>1</sub>.

### S3. Characterization of $\{L_1+Cu^{2+}\}$ complex

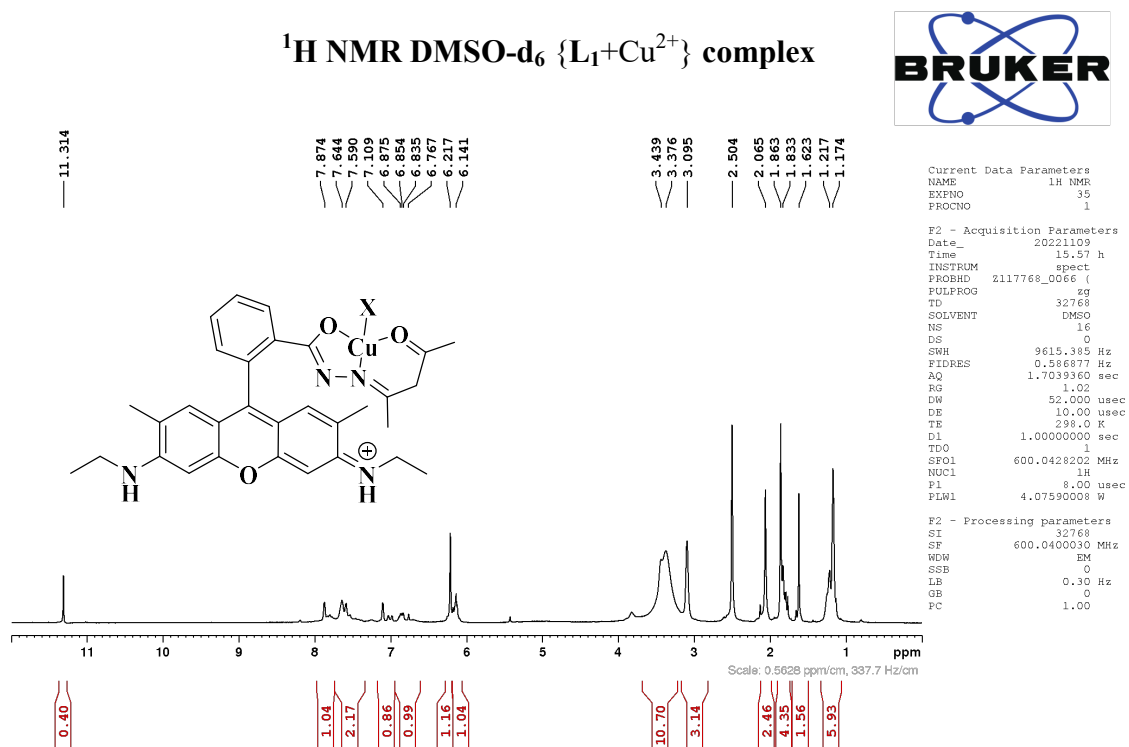

**Fig.S3.**  $^1H$  NMR spectrum of  $\{L_1+Cu^{2+}\}$  complex in DMSO- $d_6$

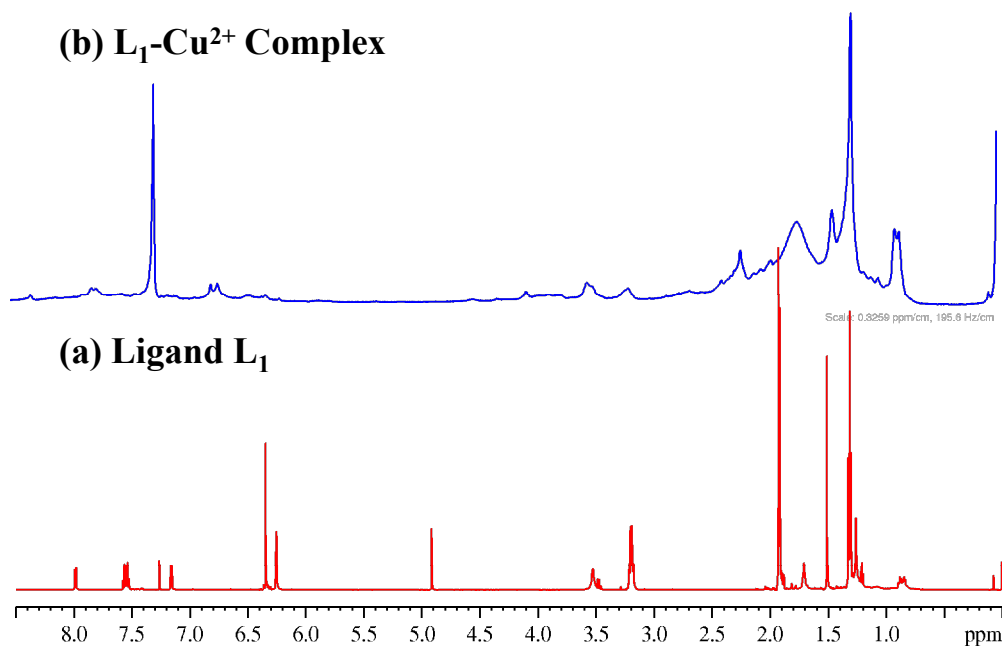

**Fig. S3.** Overlay  $^1H$ -NMR spectra of (a) Ligand ( $L_1$ ) (b)  $\{L_1+Cu^{2+}\}$  Complex.

#### S4. Absorption titration L<sub>1</sub> with of various metals ions

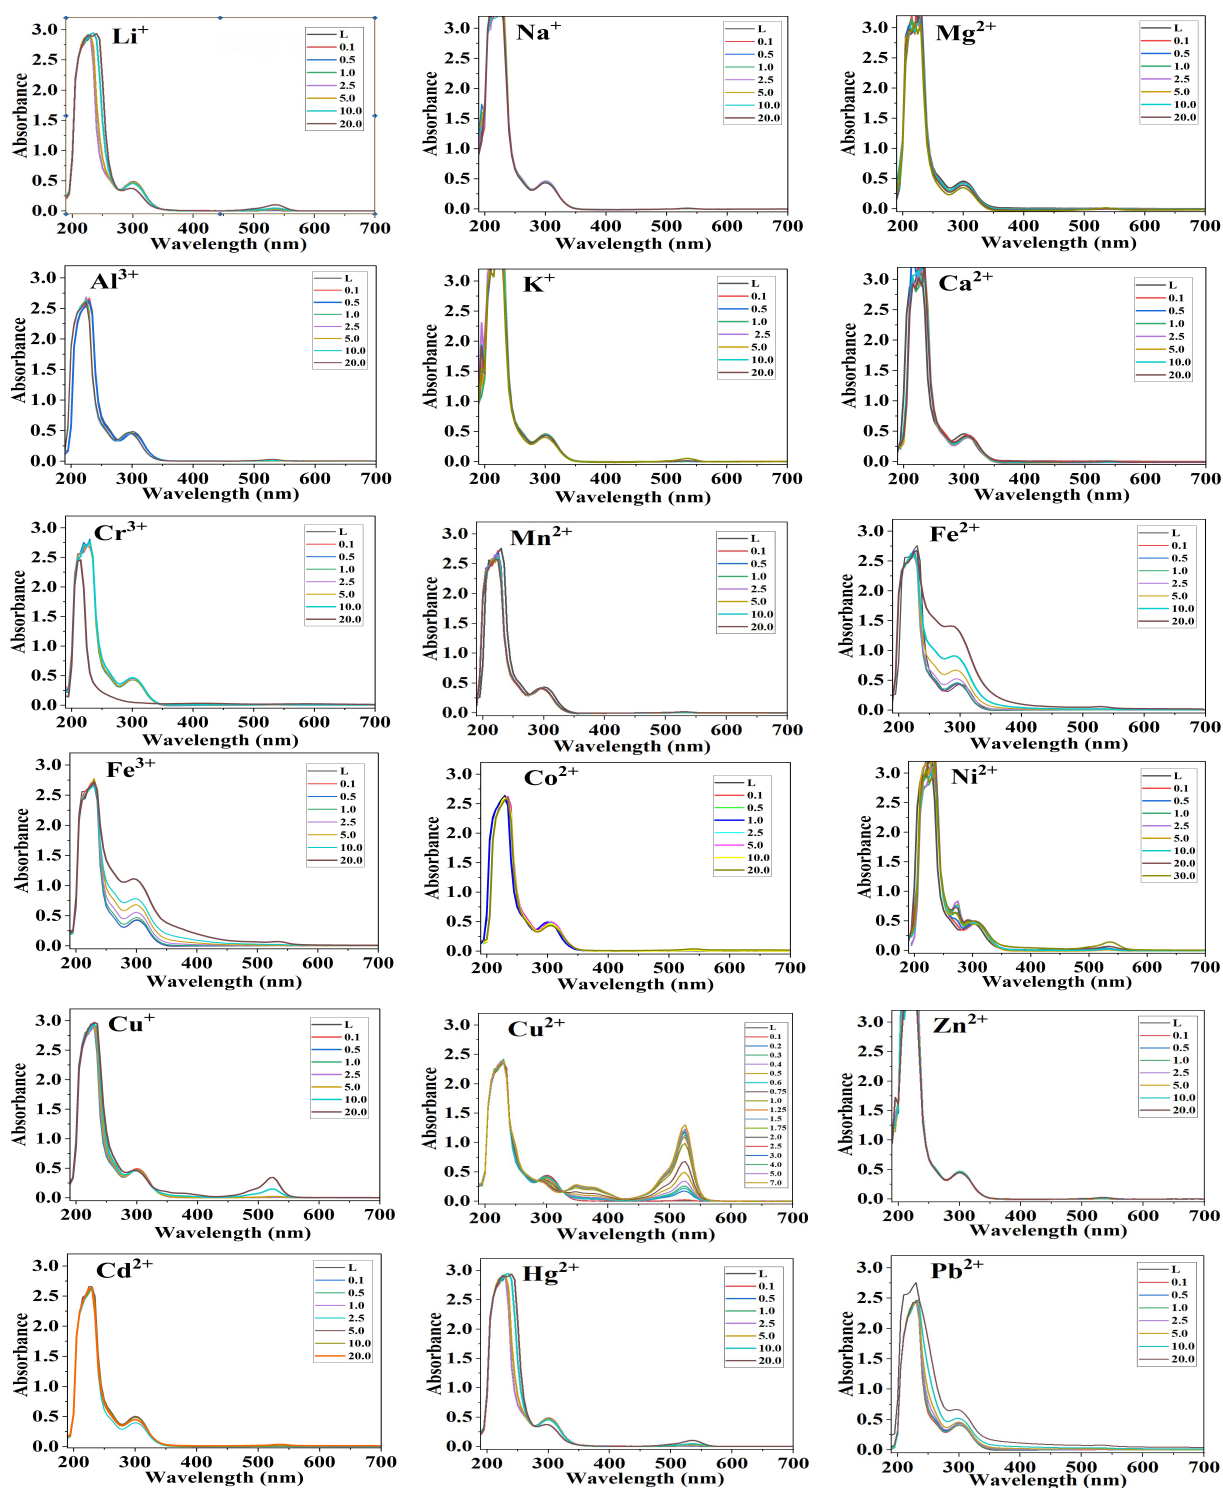

**Fig.S4.** Shows the absorbance spectra of L<sub>1</sub> (10 μM) titrated with (0-20 eq.) of various concentrations of metals in ACN/PBS buffer (0.1 mM, pH 7.4, 1:1 of v/v).



### S5. Association constant obtained from the absorption titration of $\{L_1 + Cu^{2+}\}$ complex

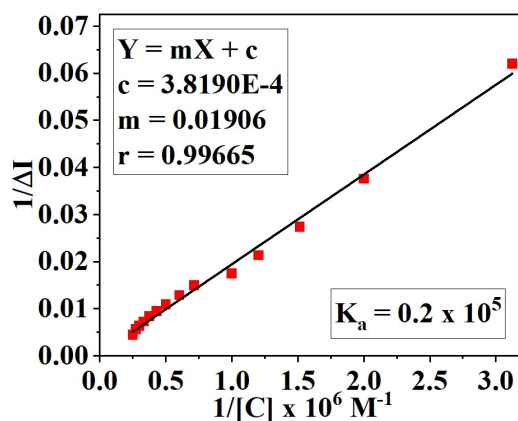

**Fig.S5.** Binding constant ( $K_a$ ) of Ligand ( $L_1$ ) with  $Cu^{2+}$  concentration in ACN: PBS (0.1 mM, pH = 7.4, v/v 1:1).

### S6. Job's plot obtained from the absorption titration

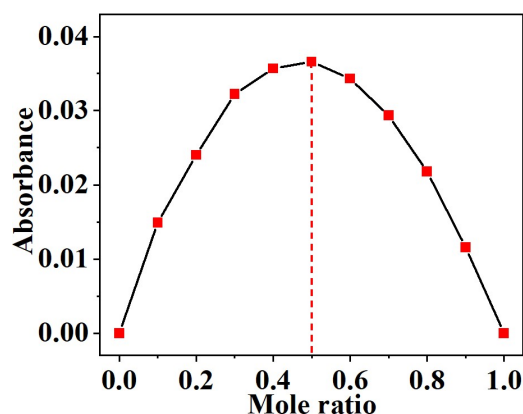

**Fig.S6.** Titration curve of  $L_1$  and  $Cu^{2+}$  at constant concentration 20 mM in ACN: PBS solution (0.1 mM, pH= 7.4, 1:1 v/v).

### S7. Determination of Limit of Detection (LOD) of $Cu^{2+}$ by $L_1$

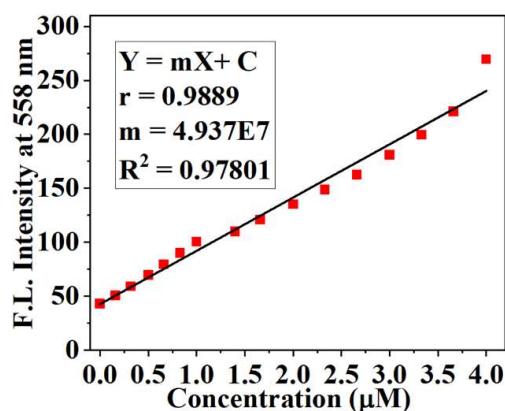

**Fig.S7.** Linear fluorescence relationship of Ligand ( $L_1$ ) with  $Cu^{2+}$  (0-4  $\mu\text{M}$ ) concentration in ACN: PBS (0.1 mM, pH = 7.4, v/v 1:1) at  $\lambda_{em} = 558 \text{ nm}$ .

**Table S8. Comparison of the detection limits of recently developed fluorescent probes for Cu<sup>2+</sup> in the literature.**

| Sr. No. | Compound                                                                            | Analytes                                               | Solvent System                                        | LOD                       | Application                             | Ref.                |
|---------|-------------------------------------------------------------------------------------|--------------------------------------------------------|-------------------------------------------------------|---------------------------|-----------------------------------------|---------------------|
| 1       | 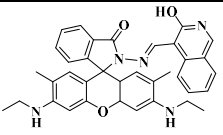   | Cu <sup>2+</sup> , Fe <sup>3+</sup>                    | Aqueous medium                                        | 1.8 x 10 <sup>-8</sup> M  | Trace out Fe <sup>3+</sup> in zebrafish | 1                   |
| 2       |    | Cu <sup>2+</sup>                                       | Tris-HCl buffer                                       | 3.9 x 10 <sup>-7</sup> M  | Lake water, drinking water              | 2                   |
| 3       |    | Cu <sup>2+</sup>                                       | ACN: H <sub>2</sub> O                                 | 5.2 x 10 <sup>-7</sup> M  | toxicity in Alzheimer disease           | 3                   |
| 4       |    | Cu <sup>2+</sup> , S <sup>2-</sup>                     | ACN: H <sub>2</sub> O Tris HCl buffer, pH=6.5         | 5.54 x 10 <sup>-7</sup> M | HeLa cells                              | 4                   |
| 5       |   | Cu <sup>2+</sup>                                       | ACN: HEPES buffer (pH 7.0, 1:1 of v/v)                | 28 x 10 <sup>-8</sup> M   | Drinking water, Human serum, HeLa cells | 5                   |
| 6       |  | Cu <sup>2+</sup> , Fe <sup>2+</sup> , Fe <sup>3+</sup> | DMF                                                   | 2.48 x 10 <sup>-6</sup> M | NA                                      | 6                   |
| 7       |  | Cu <sup>2+</sup> , Al <sup>3+</sup>                    | H <sub>2</sub> O:ACN (3:7, v/v, HEPES buffer, pH 7.4) | 321 nM                    | Cell imagine studies in SiHa cells      | 7                   |
| 8       |  | Hg <sup>2+</sup> , Cu <sup>2+</sup>                    | DMF: H <sub>2</sub> O (2:8, v/v)                      | 1.91 x 10 <sup>-7</sup> M | On filter paper and in water            | 8                   |
| 9       |  | Cu <sup>2+</sup>                                       | ACN: PBS solution (0.1 mM, pH: 7.4, v/v =1:1)         | 3.58 x 10 <sup>-8</sup> M | L929 and HeLa cells                     | <b>Present work</b> |

**S09. Competitive metal ion titration of  $L_1$  with  $Cu^{2+}$  in presence of other metal ions.**

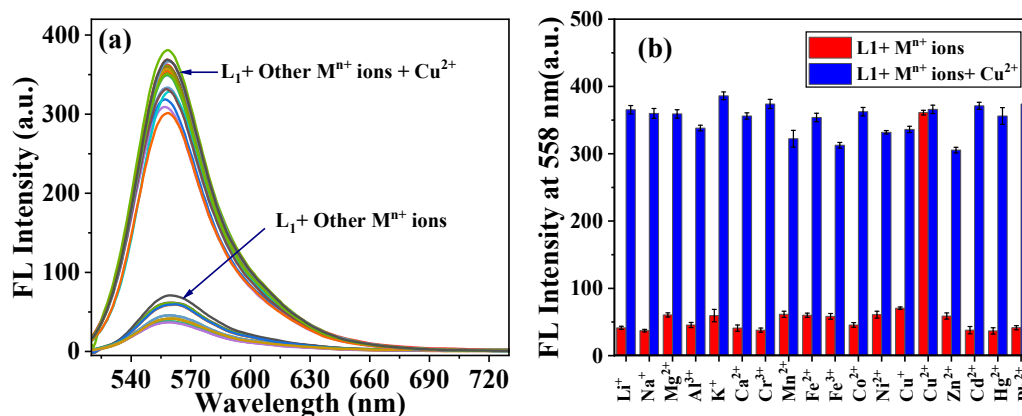

Fig.S09. Spectra from fluorescence titration of  $L_1$  (10  $\mu$ M) with metal ions (100  $\mu$ M) and (b) Histograms showing the fluorescence emission intensity at 558 nm of  $L_1$  with  $Cu^{2+}$  in the presence of competitive metal ions.

**S10. Effect of pH on the fluorescence emission of  $L_1$  with  $Cu^{2+}$ .**

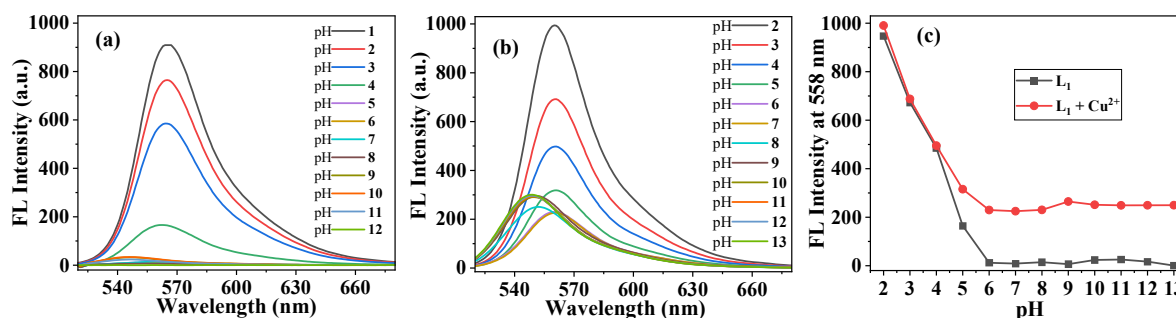

Fig. S10 Fluorescence response of (a)  $L_1$ (10 mM), (b)  $\{L_1 + Cu^{2+}\}$  (10 eq.) and (c) corresponding fluorescence emission at 558 nm vs. pH range from 2 to 13.

### S11. MTT assay of probe L<sub>1</sub>

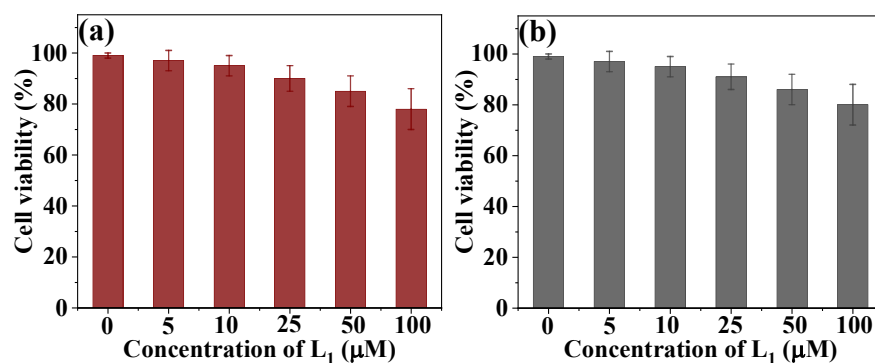

Fig. S11. MTT assay of probe L<sub>1</sub> (a) L929 cells and (b) HeLa cells treated with different concentrations of probe L<sub>1</sub> for 24 h.

### S12. Confocal fluorescence microscopy images study of L<sub>1</sub> in presence of Cu<sup>2+</sup> in HeLa cells.

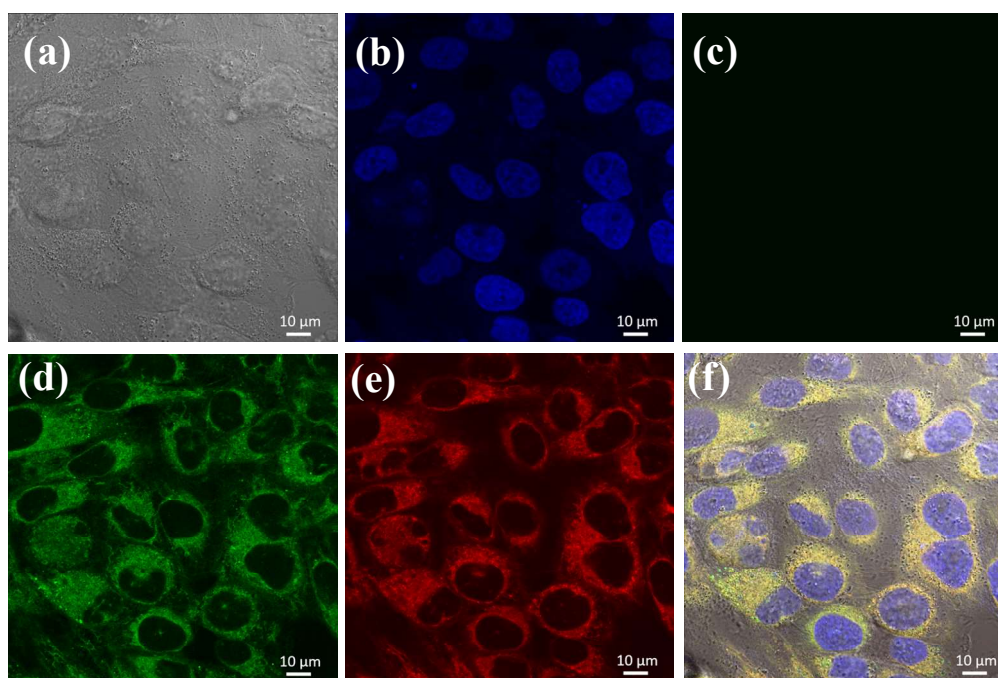

Fig. S12: Confocal fluorescence microscopy images were obtained from HeLa cells (a) DIC image, (c) cells were incubated only with L<sub>1</sub> (10 μM), (d) cells treated with L<sub>1</sub> followed by Cu<sup>2+</sup> (20 μM) green Channel and (e) red Channel and (f) merged image of b, d and e.

## References

- 1 A. S. Murugan, N. Vidhyalakshmi, U. Ramesh and J. Annaraj, Sensors and Actuators B: Chemical In vivo bio-imaging studies of highly selective , sensitive rhodamine based fluorescent chemosensor for the detection of Cu<sup>2+</sup> / Fe<sup>3+</sup> ions, *Sensors Actuators B. Chem.*, 2018, **274**, 22–29.
- 2 Q. Huang, Y. T. Chen, Y. W. Ren, Z. Y. Wang, Y. X. Zhu and Y. Zhang, A rapid and naked-eye visible rhodamine 6G-based chemosensor for sensitive detection of copper(ii) ions in aqueous solution, *Anal. Methods*, 2018, **10**, 5731–5737.
- 3 B. S. Chauhan, A. Rai, A. K. Sonkar, K. Tripathi, S. Upadhyay, L. Mishra and S. Srikrishna, Neuroprotective Activity of a Novel Synthetic Rhodamine-Based Hydrazone against Cu<sup>2+</sup>-Induced Alzheimer’s Disease in Drosophila, *ACS Chem. Neurosci.*, 2022, **13**, 1566-1579.
- 4 A. Majumdar, C. S. Lim, H. M. Kim and K. Ghosh, New Six-Membered pH-Insensitive Rhodamine Spirocyclic in Selective Sensing of Cu<sup>2+</sup> through C-C Bond Cleavage and Its Application in Cell Imaging, *ACS Omega*, 2017, **2**, 8167–8176.
- 5 P. Puangploy, S. Smanmoo and W. Surareungchai, A new rhodamine derivative-based chemosensor for highly selective and sensitive determination of Cu<sup>2+</sup>, *Sensors Actuators, B Chem.*, 2014, **193**, 679–686.
- 6 X. Zhu, Y. Duan, P. Li, H. Fan, T. Han and X. Huang, A highly selective and instantaneously responsive Schiff base fluorescent sensor for the ‘turn-off’ detection of iron(III), iron(II), and copper(II) ions, *Anal. Methods*, 2019, **11**, 642–647.
- 7 A. Rai, A. K. Singh, K. Tripathi, A. K. Sonkar, B. S. Chauhan, S. Srikrishna, T. D. James and L. Mishra, A quick and selective rhodamine based “smart probe” for “signal-on” optical detection of Cu<sup>2+</sup> and Al<sup>3+</sup> in water, cell imaging, computational studies and solid state analysis, *Sensors Actuators, B Chem.*, 2018, **266**, 95–105.
- 8 M. Gosi, A. C. Kumar and Y. Sunandamma, Fluorescence Variation in Selective Sensing of Hg<sup>2+</sup> and Cu<sup>2+</sup> Ions By Coumarin-xanthene Fused Optical Probe, *J. Fluoresc.*, 2022, **32**, 2379–2393.
